# Supplementary material for: Selectivity of Terpyridine Platinum Anticancer Drugs for G-quadruplex DNA
Source: PubMed Central journal article supplement (PMC6385020; doi:10.3390/molecules24030404), 2019-01-23
Supplement: molecules-24-00404-s001.pdf [file molecules-24-00404-s001.pdf]

## Supporting information

# Selectivity of Terpyridine platinum anti-cancer drugs for G-quadruplex DNA

**Elodie Morel<sup>1,2,†</sup>, Claire Beauvineau<sup>1,2,†</sup>, Delphine Naud-Martin<sup>1,2</sup>, Corinne Landras-Guetta<sup>1,2</sup>, Daniela Verga<sup>1,2</sup>, Deepanjan Ghosh<sup>1,2</sup>, Sylvain Achelle<sup>1,2,3</sup>, Florence Mahuteau-Betzer<sup>1,2</sup>, Sophie Bombard<sup>1,2\*</sup> and Marie-Paule Teulade-Fichou<sup>1,2\*</sup>**

<sup>1</sup> Institut Curie, PSL Research University, CNRS-UMR 9187, INSERM U1196, F-91405, Orsay, France.

<sup>2</sup> Université Paris Sud, Université Paris-Saclay, CNRS-UMR 9187, INSERM U1196, F-91405 Orsay, France

<sup>3</sup> Univ Rennes, CNRS, ISCR-UMR 6226, F-35000 Rennes, France

\* Correspondence [marie-paule.teulade-fichou@curie.fr](mailto:marie-paule.teulade-fichou@curie.fr) (M-P.T-F) and [sophie.bombard@curie.fr](mailto:sophie.bombard@curie.fr) (S.B); Tel.: 33169863086 and 33169863189

† These authors contributed equally to this work.

A

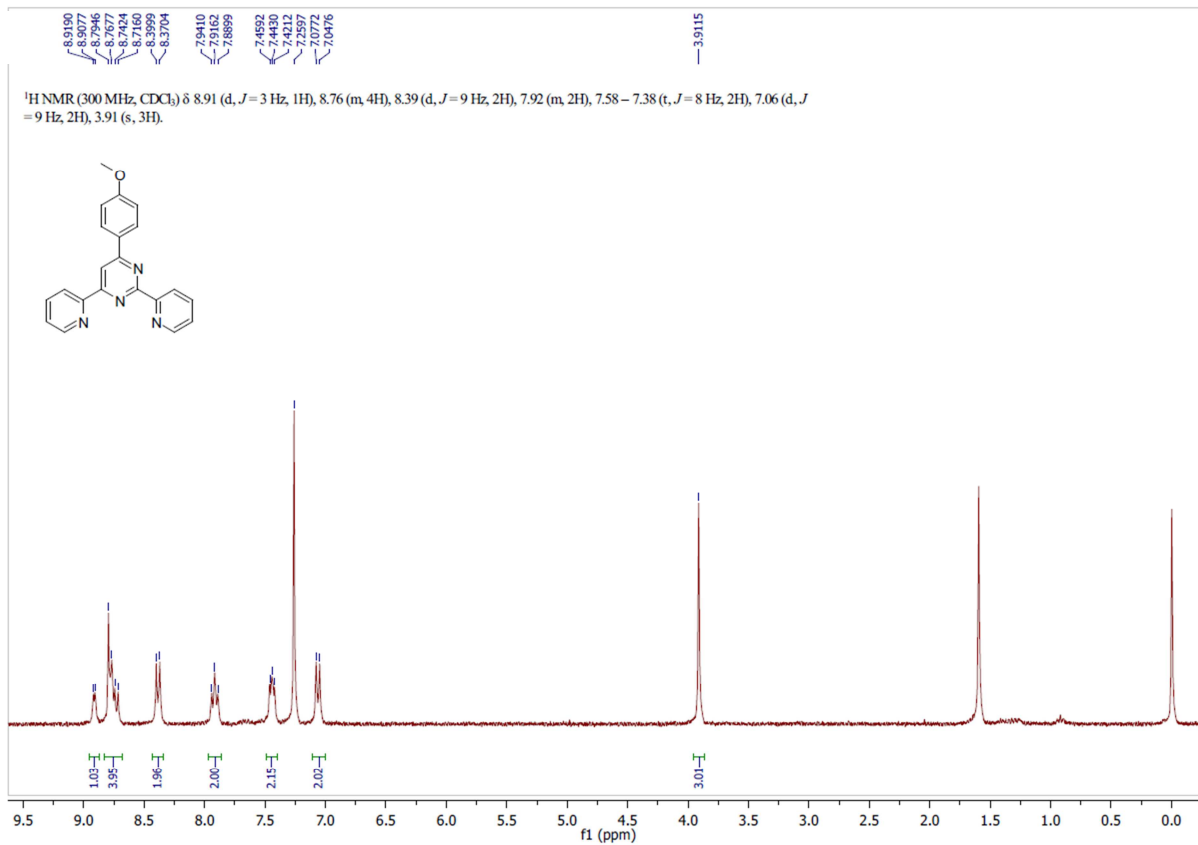

B

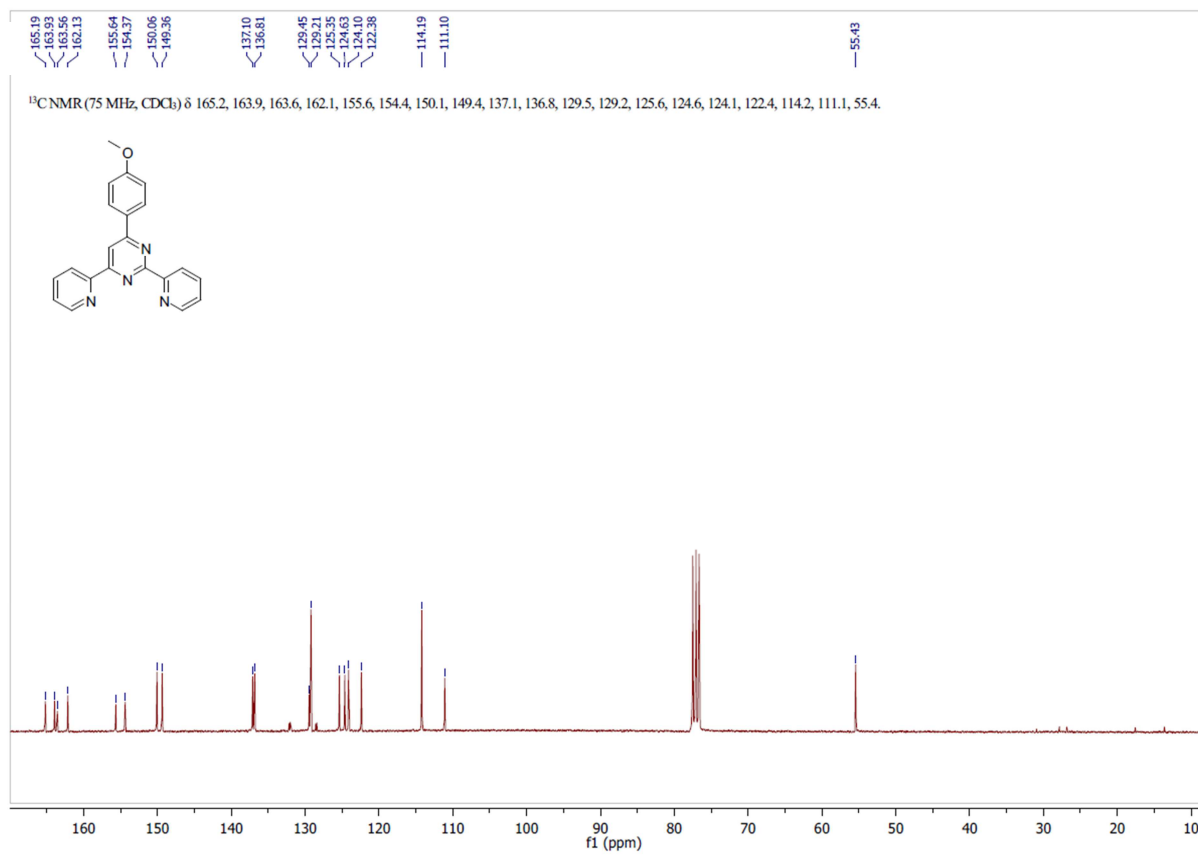

C

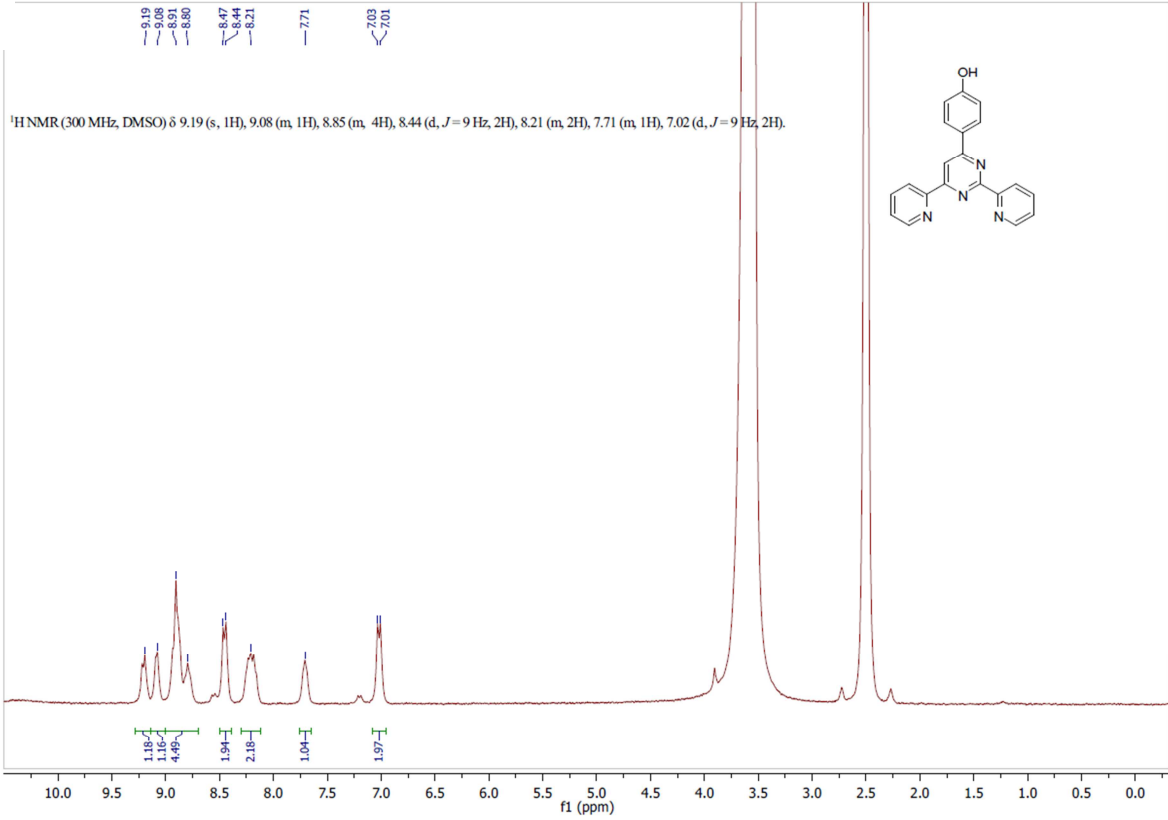

D

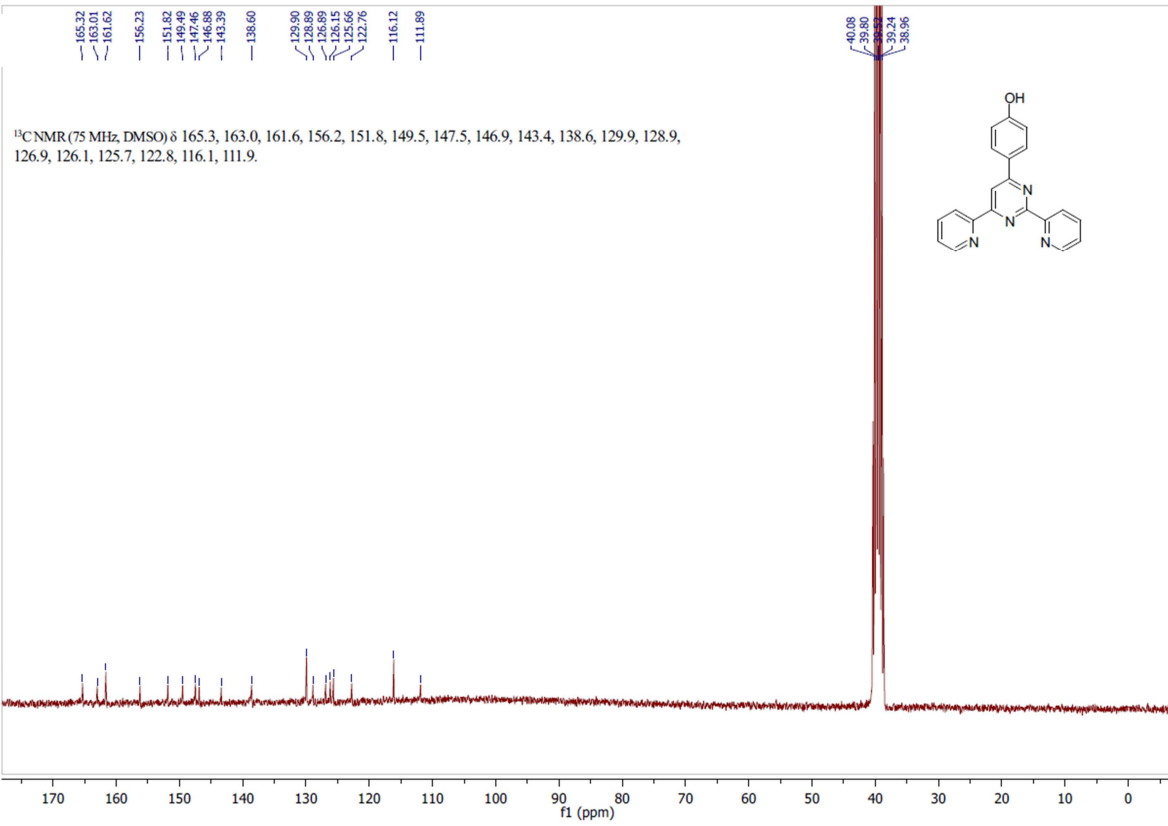

E

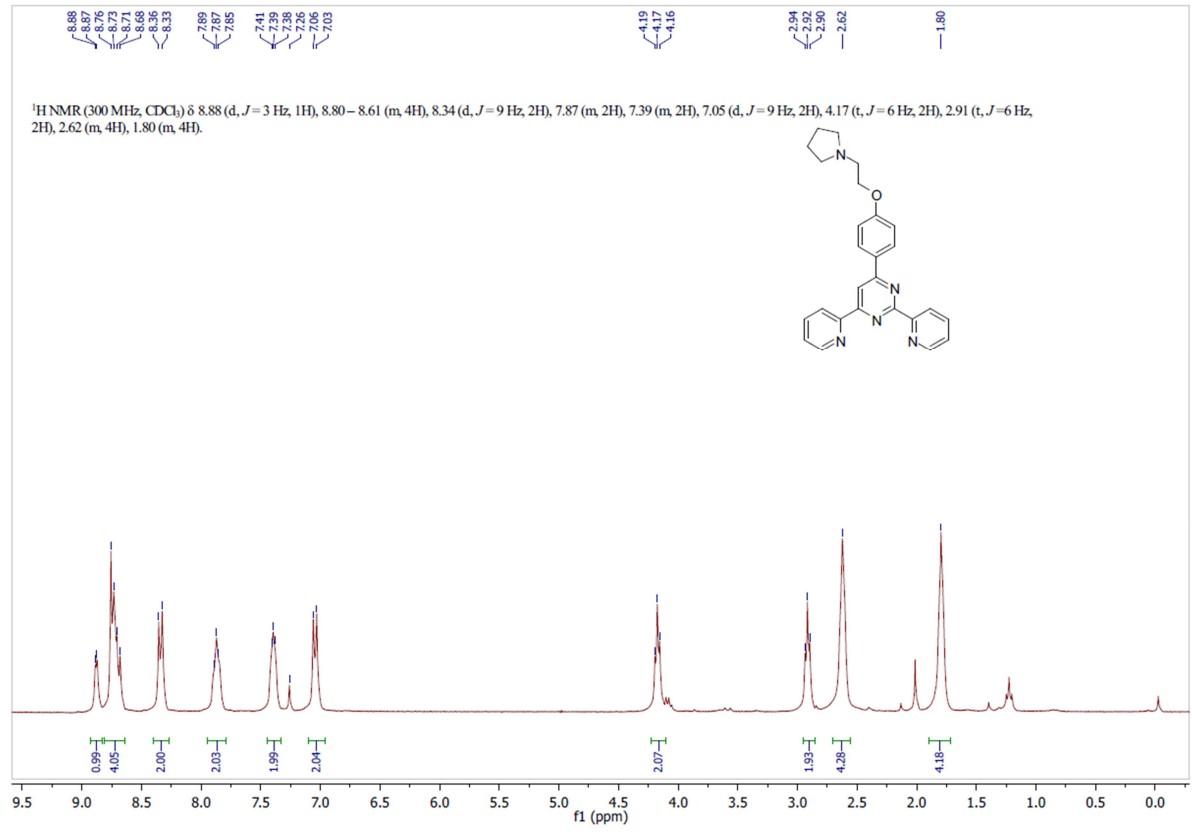

F

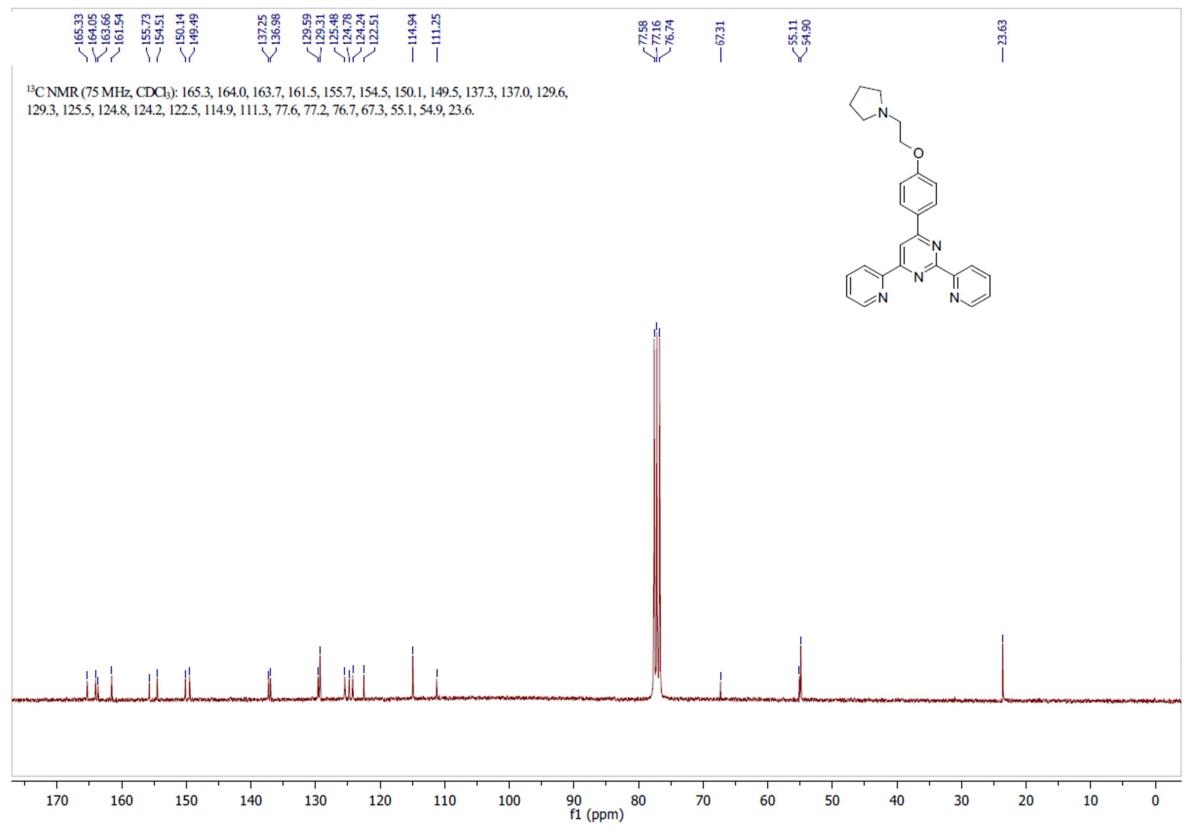

G

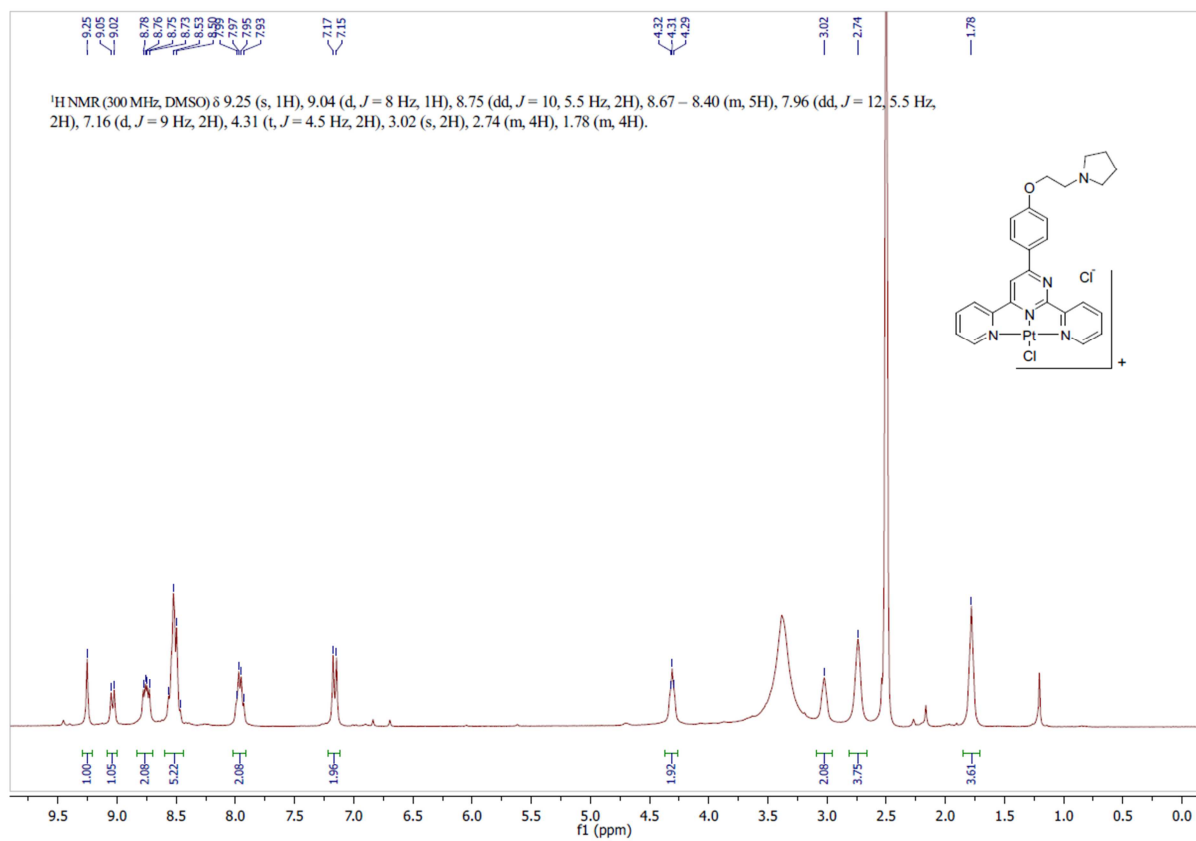

H

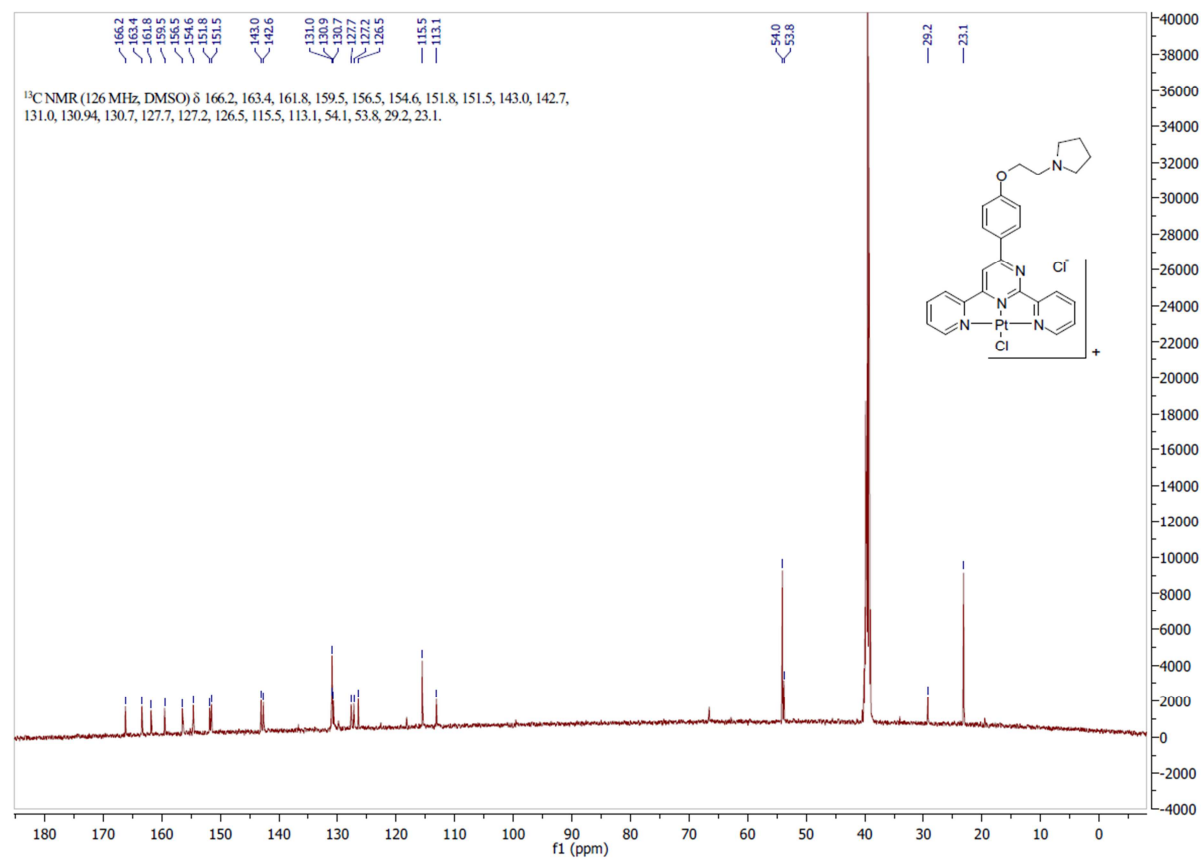

I

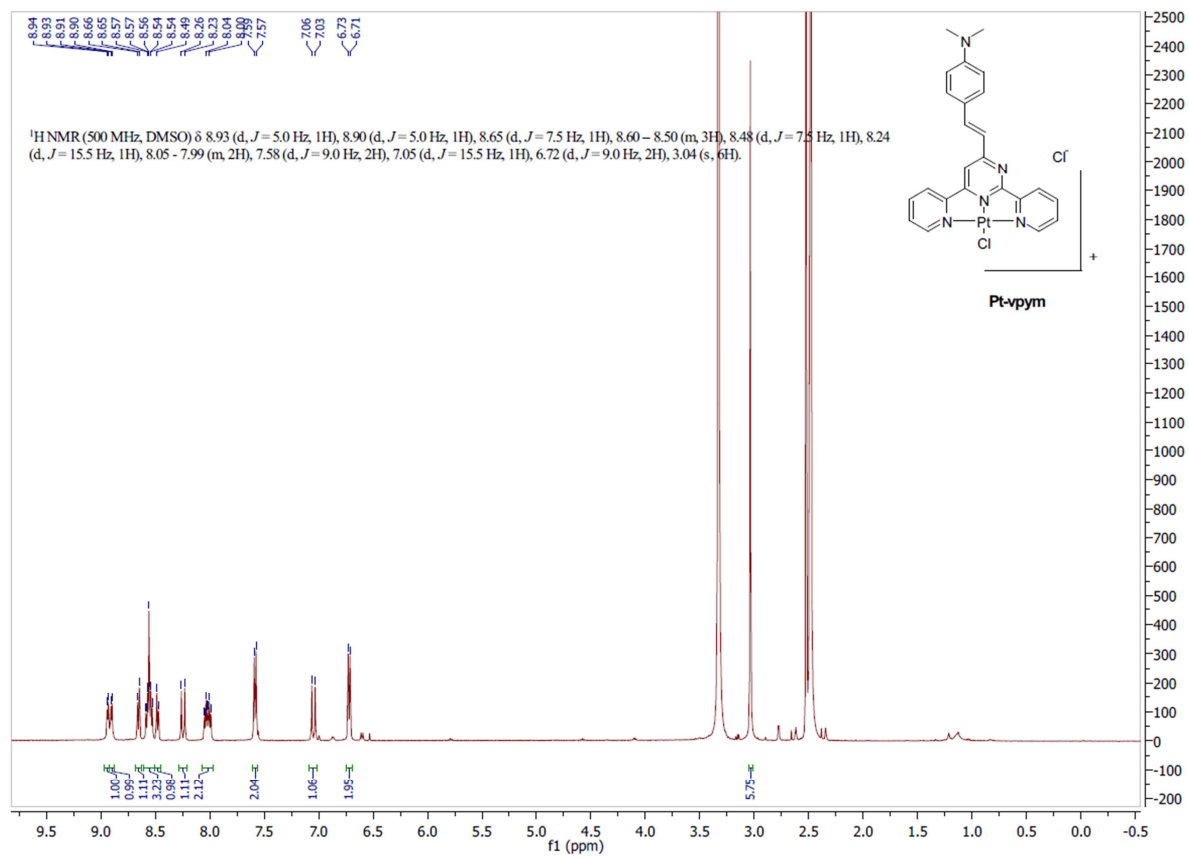

J

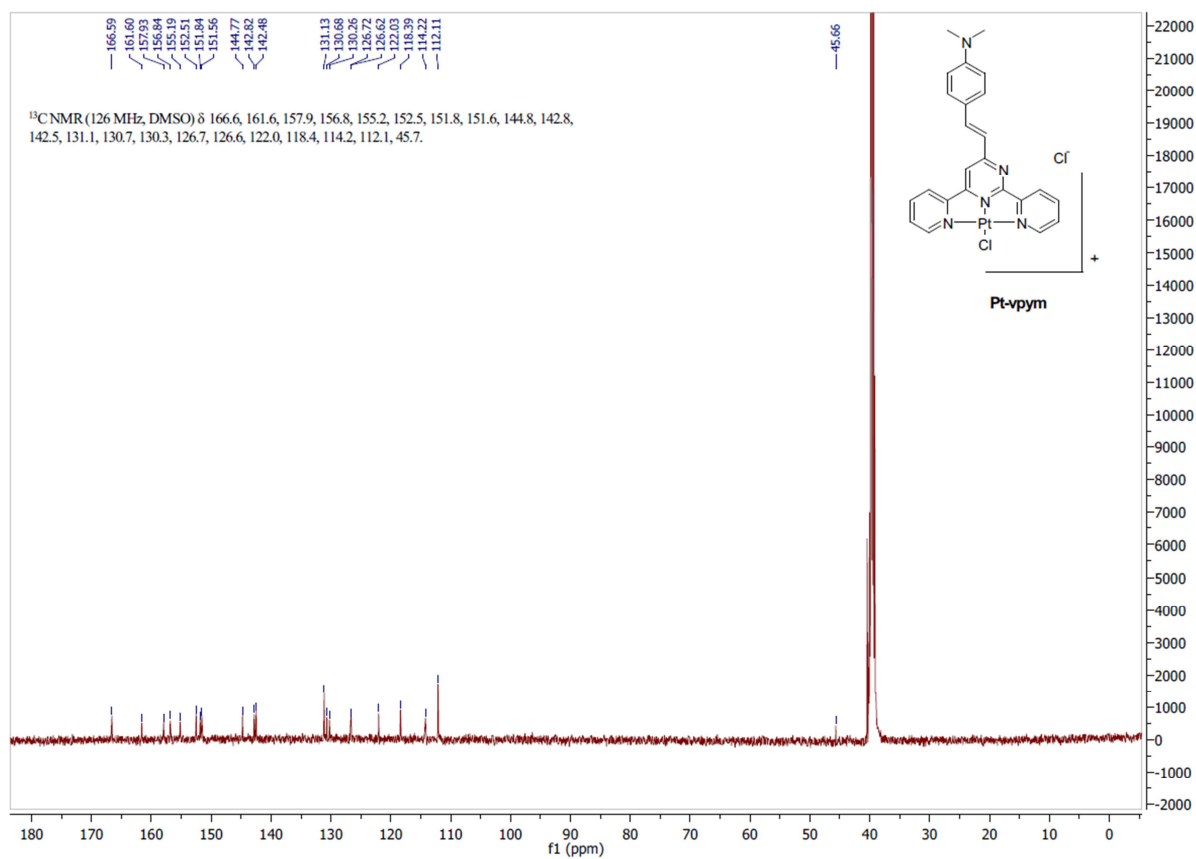

K

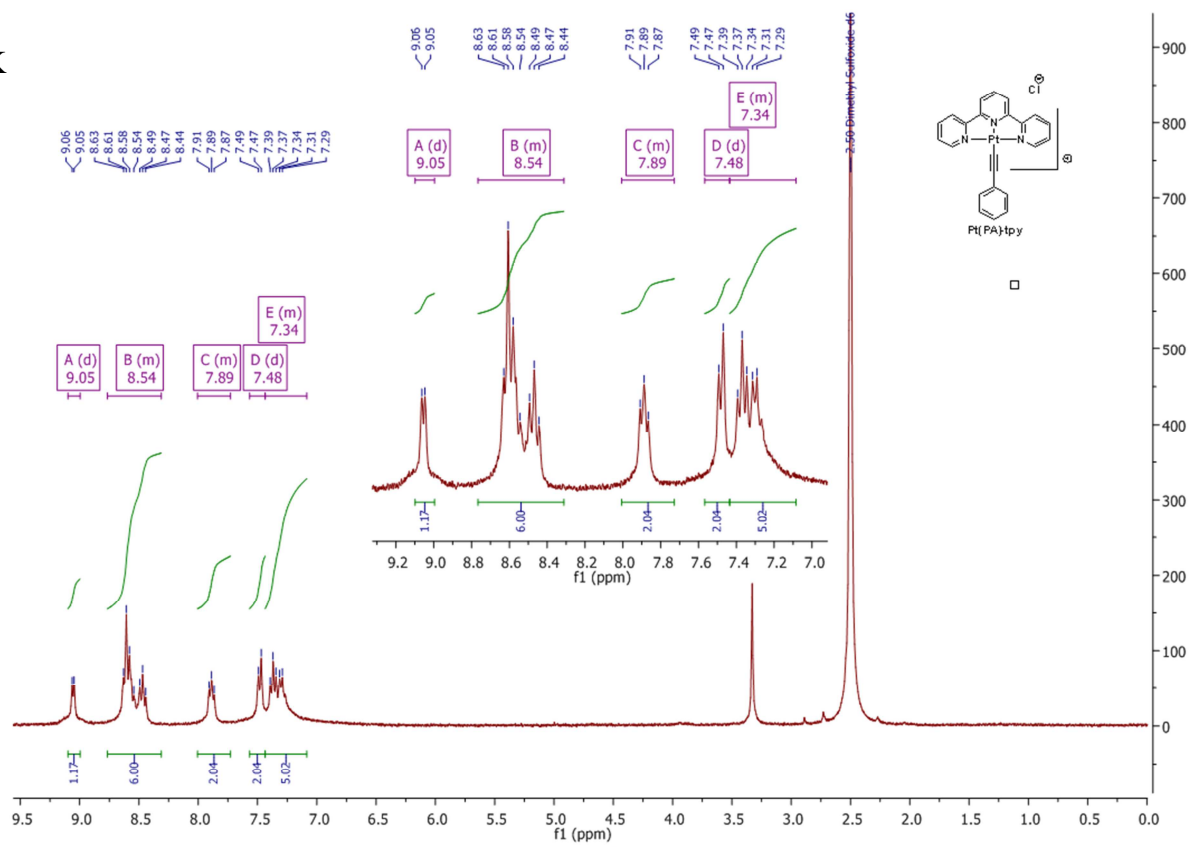

**Figure S1:**  $^1\text{H}$  NMR and  $^{13}\text{C}$  spectra, respectively, of compound 2 (A, B), compound 3 (C, D), **cpym** (E, F), **Pt-cpym** (G, H), **Pt-vpym** (I, J) and  $^1\text{H}$  NMR spectrum of **Pt(PA)-tpy** (K).

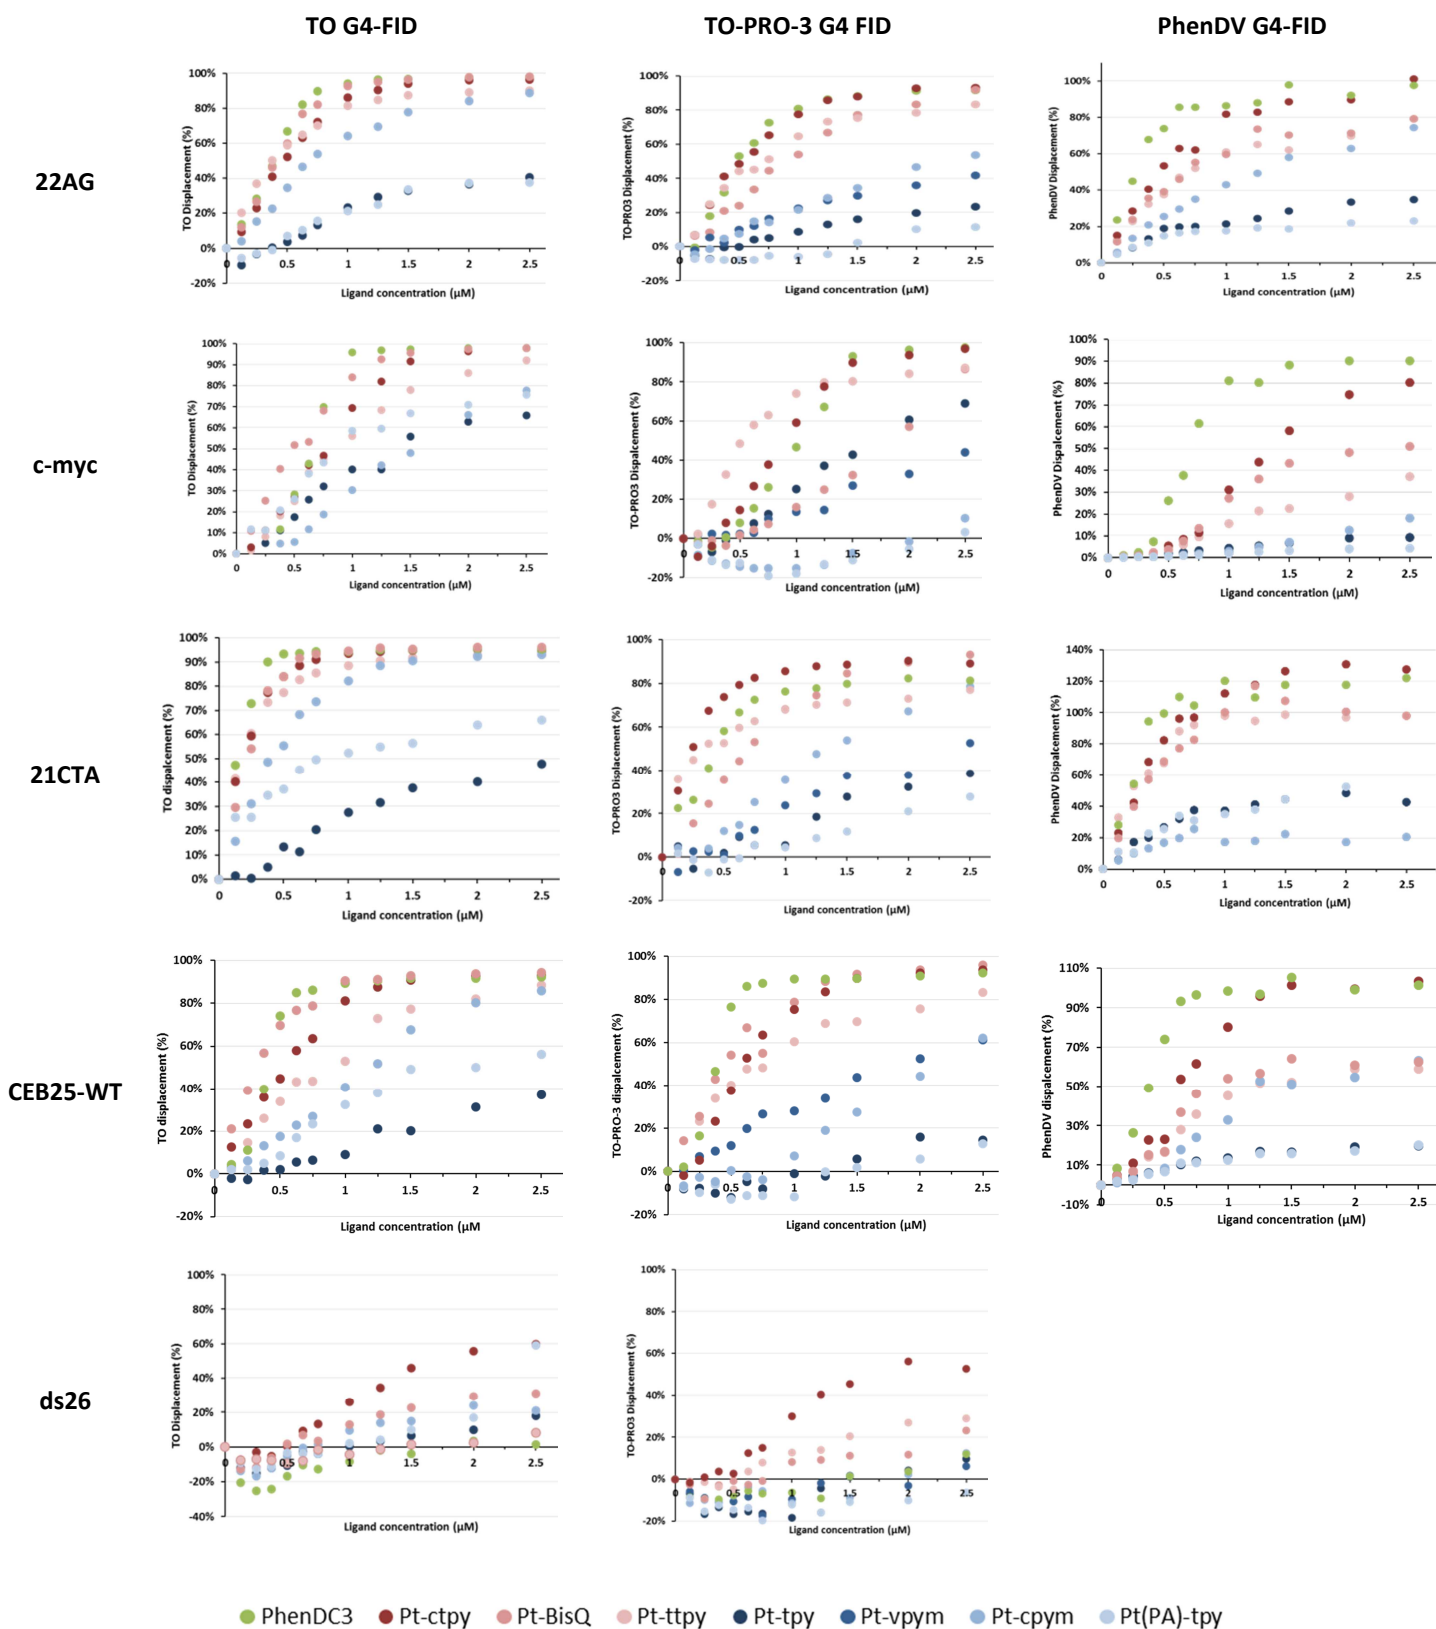

**Figure S2.** Fluorescence Intercalator Displacement (FID) assays, for compounds **Pt-BisQ**, **Pt-ctpy**, **Pt-ttpty**, **Pt-cpym**, **Pt-vpym**, **Pt(PA)-tpy** and **Pt-tpy** with G4 DNA (22AG, c-myc, 21CTA and 25CEBWT, 0,25  $\mu$ M) in presence of Thiazole Orange (TO), TO-PRO-3 (2 equivalents), and PhenDV (1.5 equivalents). Affinities of ligands are expressed by probe displacement as indicated in material and methods. Buffer used is K<sup>+</sup>100 (10 mM lithium cacodylate, 100 mM KCl and 1 % DMSO, pH = 7.3).



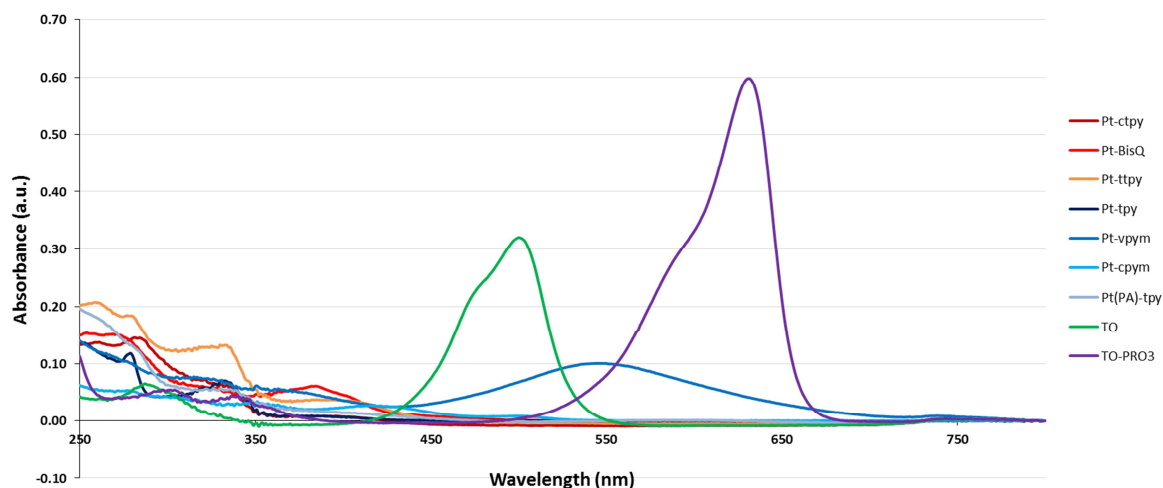

Figure S3. UV-Vis spectra of Pt-complexes, TO and TO-PRO-3 at 5  $\mu\text{M}$  in water.

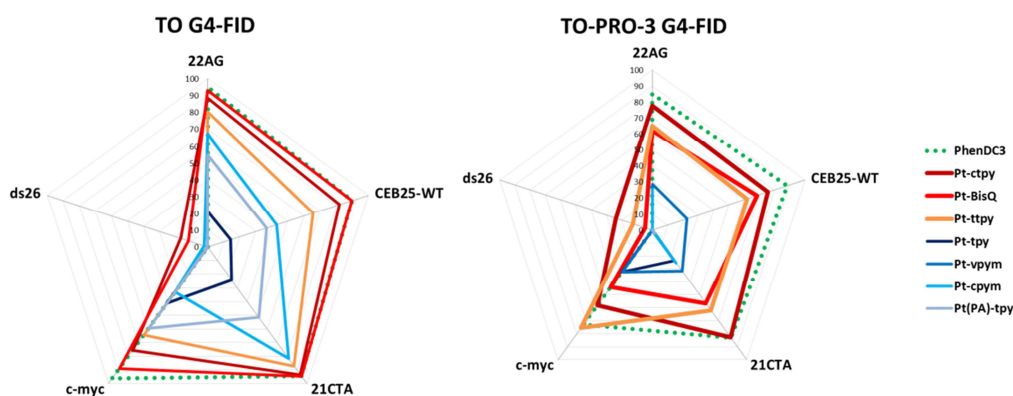

Figure S4: % of probe displacement at 1  $\mu\text{M}$  ligand (**Pt-BisQ**, **Pt-ctpy**, **Pt-ttpty**, **Pt-cpym**, **Pt-vpym**, **Pt(PA)-tpy** and **Pt-tpy** and PhenDC3 used as control) from G4-FID assay. Experiments are performed on the G-quadruplex structure of 22AG, c-myc, 21CTA, CEB25WT (as shown in Figure 1A) and on duplex ds26 DNA (0,25  $\mu\text{M}$ ), with thiazole orange (TO) (2 eq. for G4-DNA & 3eq. for ds26), TO-PRO-3 (2 eq. for G4-DNA & 3eq. for ds26) in  $\text{K}^+$ 100 buffer (100 mM KCl and 10 mM lithium cacodylate, pH = 7.3).

## PLATINATION OF G-QUADRUPLEX DNA

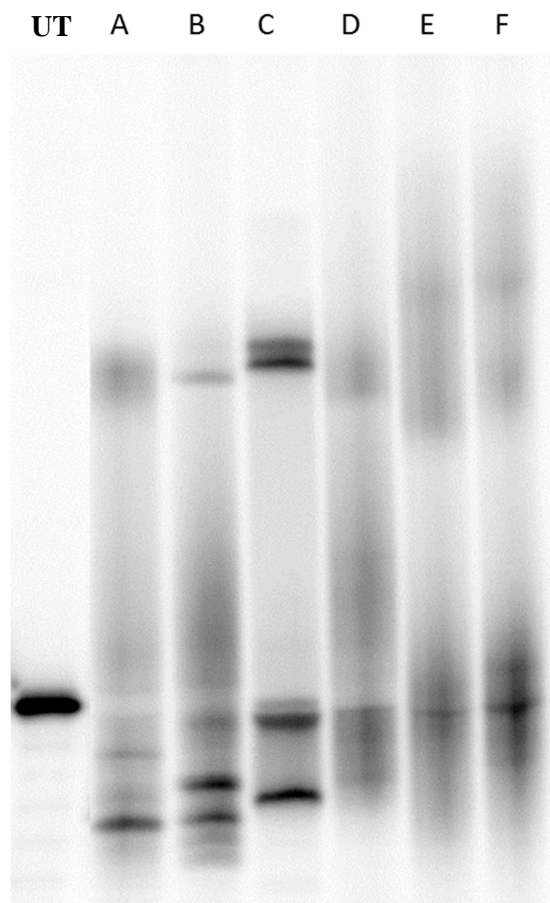

**Figure S5.** Denaturing gel electrophoresis (15 % acrylamide) of platination reactions induced by 2 equivalents of compounds **Pt-ttpy** (A), **Pt-tpy** (B), Pt-BisQ (C), **Pt-ctpy** (D), **Pt-cpym** (E), and **Pt-vpym** (F) on c-myc (100  $\mu$ M) in the presence of K<sup>+</sup>100 buffer after 18h incubation at 32°C. Lane labelled with UT corresponds to untreated c-myc.

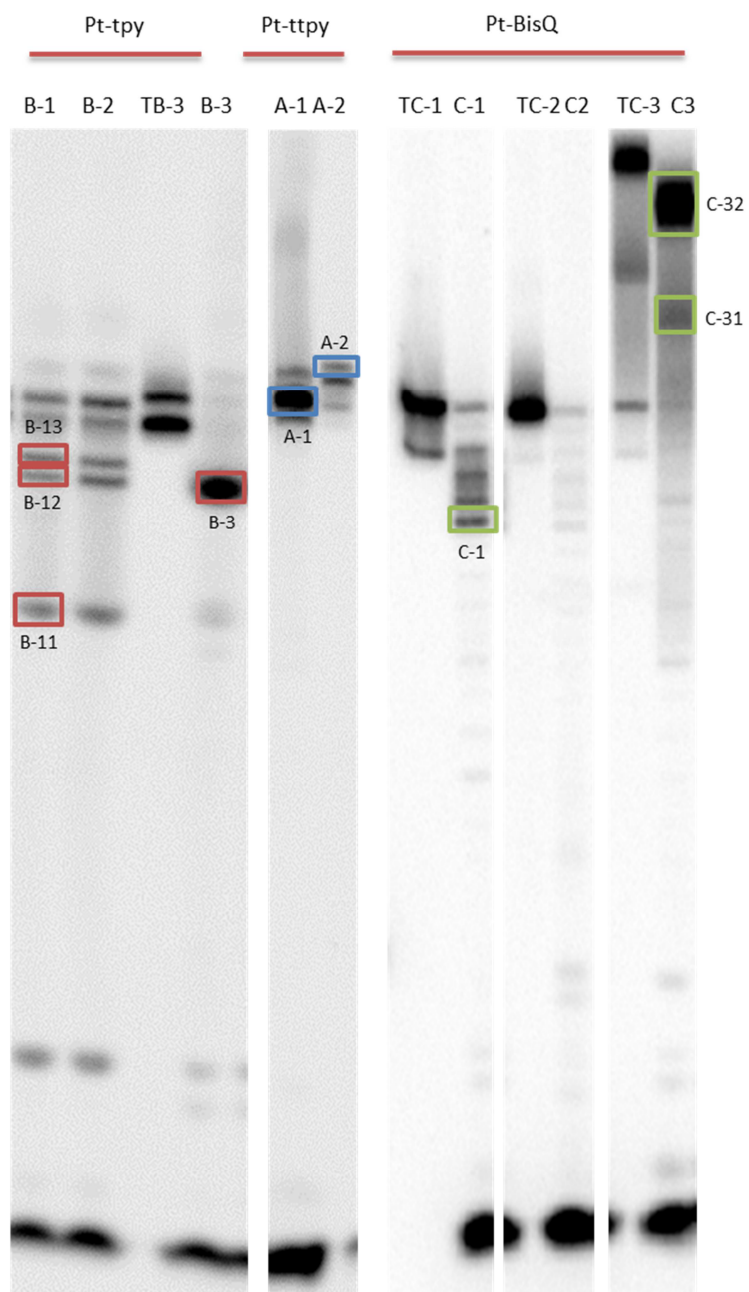

**Figure S6.** Denaturing gel electrophoresis (20% acrylamide) of 3'-exonuclease digestion of bands obtained by platination of c-myc with **Pt-ttpy**, **Pt-tpy** and **Pt-BisQ** from Figure 4. Lane labelled with T corresponds to the non-digested bands.

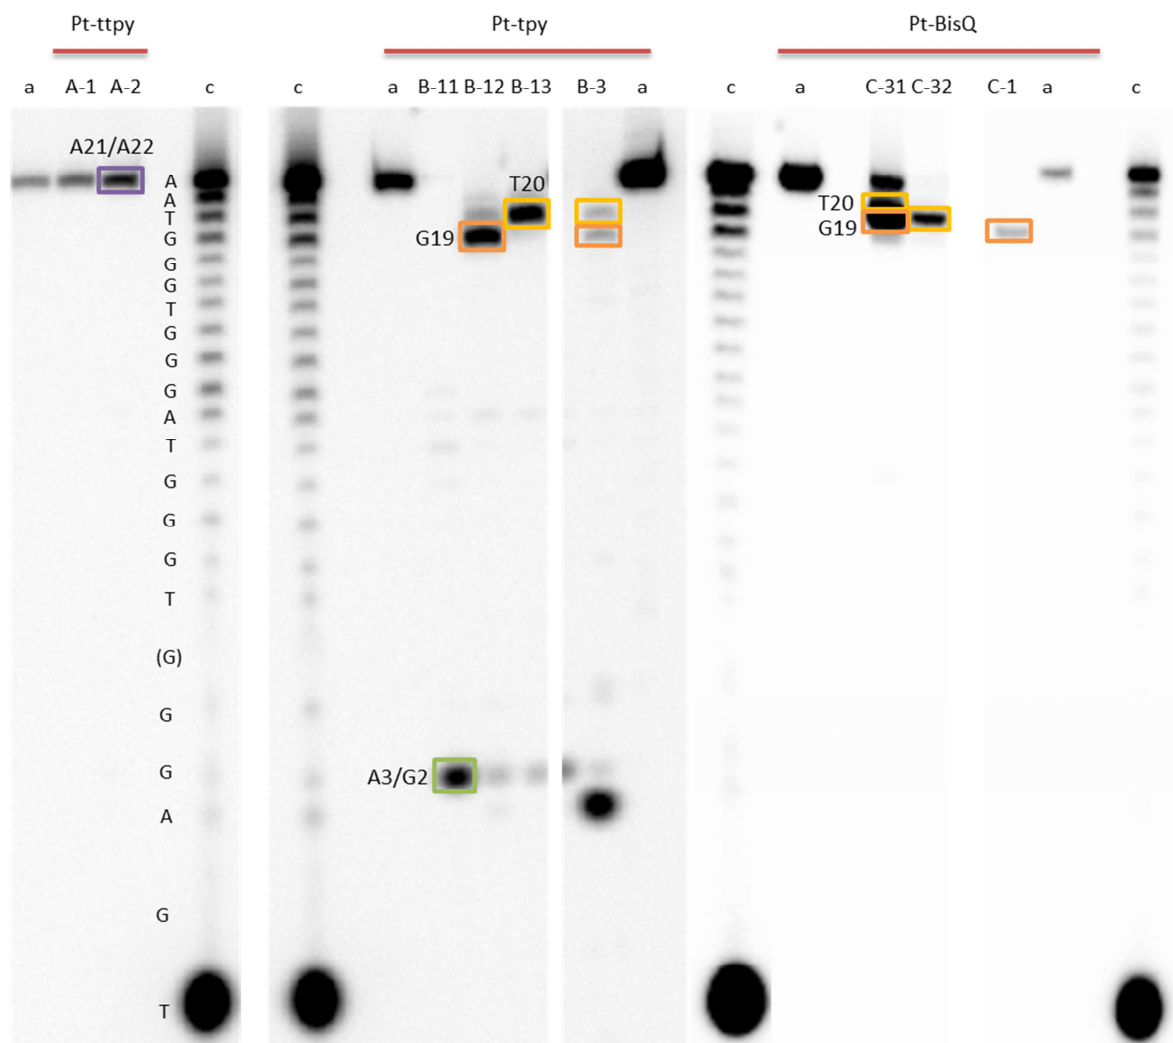

**Figure S7.** Denaturing gel electrophoresis (20% acrylamide) of the fragments of digestion from Figure S6 after deplatination using NaCN 0.2M at 32 °C for 18 hours. Lane c corresponds to the partial digestion of non-platinated DNA c-myc (0.008 unit enzyme/ $\mu$ M), and it gives the reference scale for the migration of the deplatinated digested fragments. Lane a corresponds to the non-digested oligonucleotide c-myc. The letter and number indicate the platinum binding site.

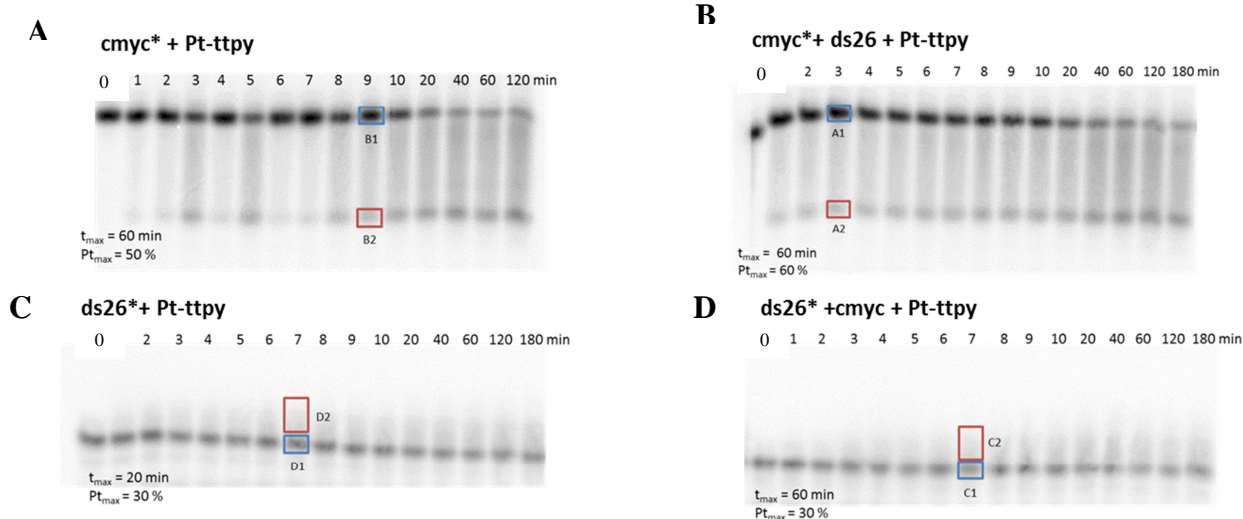

**Figure S8.** Kinetics of formation of platinated adduct of  $^{32}\text{P}$  radiolabeled c-myc\* ( $0.2 \mu\text{M}$ ) (A) and cold duplex DNA ds26 ( $10 \mu\text{M}$ ) (B) or of  $^{32}\text{P}$  radiolabeled ds26\* ( $10 \mu\text{M}$ ) (C) and cold c-myc ( $0.2 \mu\text{M}$ ) (D) in the presence of **Pt-ttpty** ( $5 \mu\text{M}$ ) in  $\text{K}^+10$  buffer at  $25^\circ\text{C}$  followed by denaturing acrylamide gel electrophoresis.

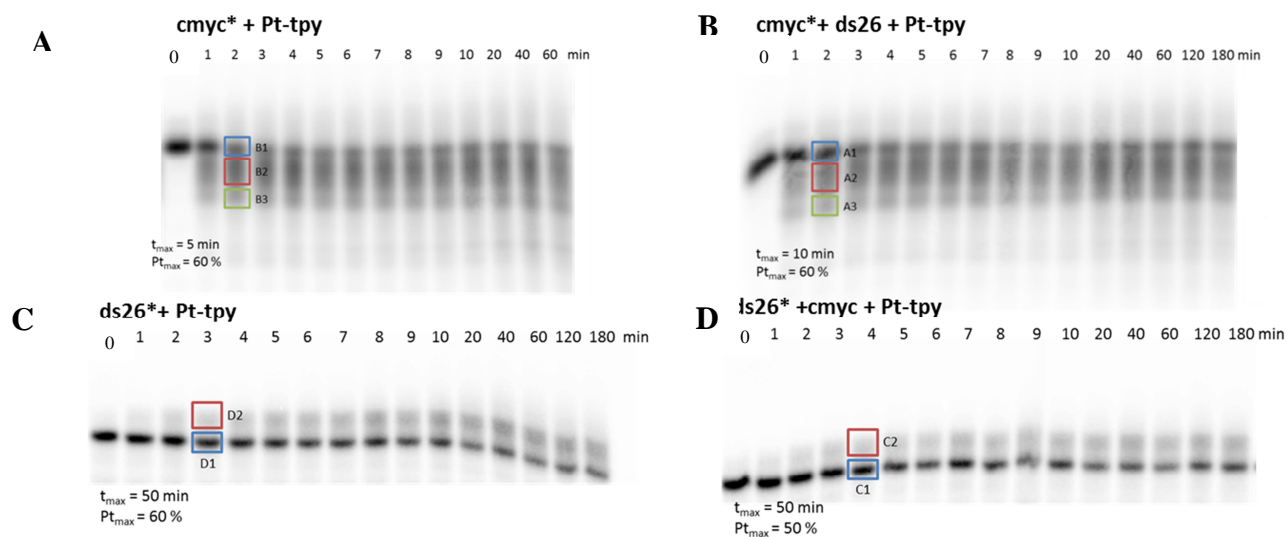

**Figure S9.** Kinetics of formation of platinated adduct of  $^{32}\text{P}$  radiolabeled c-myc\* ( $0.2 \mu\text{M}$ ) (A) and cold duplex DNA ds26 ( $10 \mu\text{M}$ ) (B) or of  $^{32}\text{P}$  radiolabeled ds26\* ( $10 \mu\text{M}$ ) (C) and cold c-myc ( $0.2 \mu\text{M}$ ) (D) in the presence of **Pt-tpy** ( $5 \mu\text{M}$ ) in  $\text{K}^+10$  buffer at  $25^\circ\text{C}$  followed by denaturing acrylamide gel electrophoresis.

**Table S1:**  $\Delta T_m$  ( $^{\circ}\text{C}$ ) of F-21-T, F-c-myc-T, F-21CTA-T and F-CEB25-WT-T in the presence of **Pt-ctpy**, **Pt-BisQ**, **Pt-ttpty**, **Pt-tpy**, **Pt-vpym**, **Pt-cpym**, **Pt(PA)-tpy**, and PhenDC3.

| Ligand     | $\Delta T_m$ ( $^{\circ}\text{C}$ ) |                       |                      |                       |                      |                       |                      |                       |
|------------|-------------------------------------|-----------------------|----------------------|-----------------------|----------------------|-----------------------|----------------------|-----------------------|
|            | F-21-T                              |                       | F-c-myc-T            |                       | F-21CTA-T            |                       | F-CEB25-WT-T         |                       |
|            | 0 $\mu\text{M}$ ds26                | 10 $\mu\text{M}$ ds26 | 0 $\mu\text{M}$ ds26 | 10 $\mu\text{M}$ ds26 | 0 $\mu\text{M}$ ds26 | 10 $\mu\text{M}$ ds26 | 0 $\mu\text{M}$ ds26 | 10 $\mu\text{M}$ ds26 |
| Pt-ctpy    | 16.7 $\pm$ 1.1                      | 7.4 $\pm$ 1.0         | 13.0 $\pm$ 2.1       | 6.4 $\pm$ 1.3         | 14.2 $\pm$ 0.9       | 4.7 $\pm$ 0.6         | 17.0 $\pm$ 1.9       | 3.9 $\pm$ 0.5         |
| Pt-BisQ    | 20.6 $\pm$ 2.0                      | 8.9 $\pm$ 1.0         | 10.3 $\pm$ 1.8       | 3.7 $\pm$ 0.4         | 10.6 $\pm$ 1.3       | 0.4 $\pm$ 0.5         | 15.6 $\pm$ 4.1       | 3.9 $\pm$ 0.6         |
| Pt-ttpty   | 12.8 $\pm$ 2.9                      | 3.9 $\pm$ 1.9         | 9.4 $\pm$ 2.9        | 5.5 $\pm$ 2.6         | 7.5 $\pm$ 3.0        | 1.8 $\pm$ 1.2         | 10.0 $\pm$ 3.8       | 1.6 $\pm$ 0.6         |
| Pt-tpy     | 6.0 $\pm$ 1.2                       | 2.1 $\pm$ 0.5         | 3.2 $\pm$ 1.8        | 3.2 $\pm$ 2.9         | 7.0 $\pm$ 1.5        | 6.6 $\pm$ 1.0         | 4.2 $\pm$ 1.3        | 2.3 $\pm$ 2.9         |
| Pt-vpym    | 7.9 $\pm$ 2.0                       | 5.3 $\pm$ 0.5         | 3.5 $\pm$ 0.9        | 8.5 $\pm$ 2.8         | 3.7 $\pm$ 0.9        | 6.8 $\pm$ 0.3         | 3.8 $\pm$ 0.5        | 1.8 $\pm$ 0.1         |
| Pt-cpym    | 10.3 $\pm$ 2.1                      | 1.1 $\pm$ 0.1         | 1.7 $\pm$ 0.4        | 1.6 $\pm$ 1.4         | 0.8 $\pm$ 0.1        | 0.9 $\pm$ 0.3         | 2.2 $\pm$ 0.3        | 0.6 $\pm$ 0.0         |
| Pt(PA)-tpy | 5.2 $\pm$ 1.4                       | -1.0 $\pm$ 0.4        | 0.4 $\pm$ 0.5        | 0.4 $\pm$ 0.7         | 0.3 $\pm$ 0.3        | -0.5 $\pm$ 0.3        | 0.8 $\pm$ 0.3        | 0.1 $\pm$ 0.1         |
| PhenDC3    | 24.3 $\pm$ 1.4                      | 24.4 $\pm$ 1.0        | 21.3 $\pm$ 1.2       | 21.7 $\pm$ 0.7        | 18.4 $\pm$ 1.0       | 14.6 $\pm$ 1.2        | 22.0 $\pm$ 1.3       | 19.8 $\pm$ 1.7        |

**Table S2:** % of TO displacement at 1  $\mu\text{M}$  of ligand (**Pt-ctpy**, **Pt-BisQ**, **Pt-ttpty**, **Pt-tpy**, **Pt-cpym**, **Pt(PA)-tpy**, and PhenDC3) on 22AG, C-myc, 21CTA, CEB-25WT and ds26.

| Ligand     | % of TO displacement at 1 $\mu\text{M}$ of ligand |       |       |          |      |
|------------|---------------------------------------------------|-------|-------|----------|------|
|            | 22AG                                              | c-myc | 21CTA | CEB25-WT | ds26 |
| Pt-ctpy    | 88                                                | 76    | 93    | 82       | 17   |
| Pt-BisQ    | 93                                                | 89    | 95    | 90       | 12   |
| Pt-ttpty   | 80                                                | 64    | 87    | 66       | nd   |
| Pt-tpy     | 21                                                | 41    | 24    | 14       | nd   |
| Pt-cpym    | 67                                                | 33    | 82    | 43       | 2    |
| Pt(PA)-tpy | 55                                                | 59    | 52    | 37       | nd   |
| PhenDC3    | 95                                                | 96    | 95    | 90       | nd   |

**Table S3:** % of TO-PRO-3 displacement at 1  $\mu\text{M}$  of ligand (**Pt-ctpy**, **Pt-BisQ**, **Pt-ttpty**, **Pt-tpy**, **Pt-vpym**, **Pt-cpym**, **Pt(PA)-tpy**, and PhenDC3) on 22AG, C-myc, 21CTA, CEB-25WT and ds26.

| Ligand     | % of TOPRO3 displacement at 1 $\mu\text{M}$ of ligand |       |       |          |      |
|------------|-------------------------------------------------------|-------|-------|----------|------|
|            | 22AG                                                  | c-myc | 21CTA | CEB25-WT | ds26 |
| Pt-ctpy    | 78                                                    | 58    | 83    | 76       | 24   |
| Pt-BisQ    | 62                                                    | 44    | 57    | 69       | 5    |
| Pt-ttpty   | 65                                                    | 76    | 62    | 62       | 13   |
| Pt-tpy     | 12                                                    | 32    | 23    | nd       | nd   |
| Pt-vpym    | 28                                                    | 32    | 32    | 23       | nd   |
| Pt-cpym    | 25                                                    | nd    | 25    | nd       | nd   |
| Pt(PA)-tpy | nd                                                    | nd    | 3     | nd       | nd   |
| PhenDC3    | 85                                                    | 73    | 83    | 88       | nd   |

**Table S4:** % of PhenDV displacement at 1  $\mu$ M of ligand (**Pt-ctpy**, **Pt-BisQ**, **Pt-ttpty**, **Pt-tpy**, **Pt-cpym**, **Pt(PA)-tpy**, and PhenDC3) on 22AG, C-myc, 21CTA and CEB25-WT.

| Ligand     | % of PhenDV displacement at 1 $\mu$ M of ligand |       |       |          |
|------------|-------------------------------------------------|-------|-------|----------|
|            | 22AG                                            | c-myc | 21CTA | CEB25-WT |
| Pt-ctpy    | 84                                              | 29    | 100   | 72       |
| Pt-BisQ    | 64                                              | 20    | 94    | 45       |
| Pt-ttpty   | 63                                              | 22    | 90    | 45       |
| Pt-tpy     | 24                                              | 5     | 35    | 13       |
| Pt-cpym    | 43                                              | 3     | 72    | 33       |
| Pt(PA)-tpy | 20                                              | 2     | 34    | 13       |
| PhenDC3    | 92                                              | 85    | 100   | 99       |
